# Supplementary material for: Novel Bacillus-Infecting Bacteriophage B13—The Founding Member of the Proposed New Genus Bunatrivirus
Source: MDPI journal article supplement (doi:10.3390/v14102300), 2022-10-19
Supplement: s1 [file s1]

# Novel *Bacillus*-infecting Bacteriophage B13 – the Founding Member of the Proposed New Genus *Bunatrivirus*

Olesya A. Kazantseva \*, Emma G. Pilgrimova, and Andrey M. Shadrin

Laboratory of Bacteriophage Biology, G. K. Skryabin Institute of Biochemistry and Physiology of Microorganisms, Pushchino Scientific Center for Biological Research of the Russian Academy of Sciences, Federal Research Center, Pushchino, Moscow Oblast, Russia

## Supplementary Information:

---

\* Correspondence: [olesyakazantseva@bk.ru](mailto:olesyakazantseva@bk.ru) (O.A.K.); [andrey2010s@gmail.com](mailto:andrey2010s@gmail.com) (A.M.S.)

**Table S1.** The host range of the B13 phage determined on 38 *Bacillus* strains.

| <b>No</b> | <b>Bacterial species</b>     | <b>Strain</b>          | <b>Source</b>               | <b>Phage lysis</b> |
|-----------|------------------------------|------------------------|-----------------------------|--------------------|
| 1         | <i>B. cereus</i>             | VKM B-13               | VKM                         | -                  |
| 2         | <i>B. cereus</i>             | VKM B-15               | VKM                         | +                  |
| 3         | <i>B. cereus</i>             | VKM B-370              | VKM                         | +                  |
| 4         | <i>B. cereus</i>             | VKM B-373              | VKM                         | +                  |
| 5         | <i>B. cereus</i>             | VKM B-374              | VKM                         | +                  |
| 6         | <i>B. cereus</i>             | VKM B-383              | VKM                         | -                  |
| 7         | <i>B. cereus</i>             | VKM B-445              | VKM                         | +                  |
| 8         | <i>B. cereus</i>             | VKM B-473              | VKM                         | +                  |
| 9         | <i>B. cereus</i>             | VKM B-491              | VKM                         | +                  |
| 10        | <i>B. cereus</i>             | VKM B-504 <sup>T</sup> | VKM                         | +                  |
| 11        | <i>B. cereus</i>             | VKM B-681              | VKM                         | +                  |
| 12        | <i>B. cereus</i>             | VKM B-682              | VKM                         | +                  |
| 13        | <i>B. cereus</i>             | VKM B-683              | VKM                         | +                  |
| 14        | <i>B. cereus</i>             | VKM B-684              | VKM                         | +                  |
| 15        | <i>B. cereus</i>             | VKM B-686              | VKM                         | -                  |
| 16        | <i>B. cereus</i>             | VKM B-687              | VKM                         | -                  |
| 17        | <i>B. cereus</i>             | VKM B-688              | VKM                         | +                  |
| 18        | <i>B. cereus</i>             | VKM B-771              | VKM                         | -                  |
| 19        | <i>B. cereus</i>             | VKM B-810              | VKM                         | -                  |
| 20        | <i>B. cereus</i>             | VKM B-811              | VKM                         | -                  |
| 21        | <i>B. cereus</i>             | VKM B-812              | VKM                         | -                  |
| 22        | <i>B. cereus</i>             | ATCC 4342              | ATCC                        | -                  |
| 23        | <i>B. cereus</i>             | ATCC 14893             | probiotic "Bactisubtil" [1] | -                  |
| 24        | <i>B. thuringiensis</i>      | VKM B-83               | VKM                         | +                  |
| 25        | <i>B. thuringiensis</i>      | VKM B-84               | VKM                         | +                  |
| 26        | <i>B. thuringiensis</i>      | VKM B-85               | VKM                         | +                  |
| 27        | <i>B. thuringiensis</i>      | VKM B-440              | VKM                         | -                  |
| 28        | <i>B. thuringiensis</i>      | VKM B-443              | VKM                         | -                  |
| 29        | <i>B. thuringiensis</i>      | VKM B-446              | VKM                         | -                  |
| 30        | <i>B. thuringiensis</i>      | VKM B-447              | VKM                         | -                  |
| 31        | <i>B. thuringiensis</i>      | VKM B-450              | VKM                         | +                  |
| 32        | <i>B. thuringiensis</i>      | VKM B-453              | VKM                         | +                  |
| 33        | <i>B. thuringiensis</i>      | VKM B-454              | VKM                         | +                  |
| 34        | <i>B. thuringiensis</i>      | VKM B-1555             | VKM                         | -                  |
| 35        | <i>B. thuringiensis</i>      | VKM B-1557             | VKM                         | -                  |
| 36        | <i>B. thuringiensis</i>      | ATCC 35646             | ATCC                        | +                  |
| 37        | <i>B. weihenstephanensis</i> | KBAB4                  | [2]                         | +                  |
| 38        | <i>B. flexus</i>             |                        | Laboratory collection       | -                  |

**Source abbreviations:** VKM: All-Russian Collection of Microorganisms; ATCC: American Type Culture Collection.

Table S2. Annotation of *Bacillus* phage B13.

| ORF№ | Start codon | Stop codon | Strand | Blast results                                                                                                                                                                                              |                                       | Conserved domains, Blast                  |                          | Hhpred results                                                                                                                                                                                                                                             | Annotation               |
|------|-------------|------------|--------|------------------------------------------------------------------------------------------------------------------------------------------------------------------------------------------------------------|---------------------------------------|-------------------------------------------|--------------------------|------------------------------------------------------------------------------------------------------------------------------------------------------------------------------------------------------------------------------------------------------------|--------------------------|
|      |             |            |        | Name                                                                                                                                                                                                       | E-val                                 | Name, (region)                            | E-val                    | (Prob./E-val)                                                                                                                                                                                                                                              |                          |
| 1    | 76          | 438        | +      | TPA: MAG TPA: terminase small subunit [ <i>Myoviridae</i> sp.]<br><br>TPA: MAG TPA: terminase small subunit [ <i>Myoviridae</i> sp.]<br><br>TPA: MAG TPA: terminase small subunit [ <i>Myoviridae</i> sp.] | 2.0e-33<br><br>2.0e-33<br><br>5.0e-31 | -<br><br>-<br><br>-                       | -<br><br>-<br><br>-      | COG3747; COG3747; Phage terminase, small subunit [Mobilome: prophages, transposons] (99.22/1.70e-10)                                                                                                                                                       | terminase, small subunit |
| 2    | 435         | 2135       | +      | terminase large subunit [ <i>CaldiBacillus</i> phage CBP1]<br><br>TPA: MAG TPA: Large Terminase [ <i>Siphoviridae</i> sp.]<br><br>TPA: MAG TPA: Large Terminase [ <i>Siphoviridae</i> sp.]                 | 0.0e+00<br><br>0.0e+00<br><br>0.0e+00 | YmfN (52-561)<br><br>Terminase_1 (87-552) | 1.47e-97<br><br>3.71e-76 | P59217; TERL_BPSF5 Putative terminase large subunit (100.0/1.50e-58)<br><br>COG4626; YmfN; Phage terminase-like protein, large subunit, contains N-terminal HTH domain (100.0/4.60e-56)<br><br>O21870; TERL_BPLSK Terminase large subunit (100.0/2.00e-49) | terminase, large subunit |
| 3    | 2149        | 3372       | +      | TPA: MAG TPA: portal protein [ <i>Myoviridae</i> sp.]<br><br>portal protein [ <i>Clostridium</i> phage phiCD506]<br><br>portal protein [ <i>Clostridium</i> phage phiCDHM11]                               | 0.0e+00<br><br>0.0e+00<br><br>0.0e+00 | Phage_portal (41-361)                     | 1.33e-64                 | Q6QGD5; PORTL_BPT5 Portal protein (100.0/5.00e-43)<br><br>P49859; PORTL_BPHK7 Portal protein (100.0/1.30e-40)                                                                                                                                              | portal protein           |

|   |      |      |   |                                                                                                                                                                                                                  |                                          |                                                                                       |                                          |                                                                                                                                                                                                                                                 |                            |
|---|------|------|---|------------------------------------------------------------------------------------------------------------------------------------------------------------------------------------------------------------------|------------------------------------------|---------------------------------------------------------------------------------------|------------------------------------------|-------------------------------------------------------------------------------------------------------------------------------------------------------------------------------------------------------------------------------------------------|----------------------------|
|   |      |      |   |                                                                                                                                                                                                                  |                                          |                                                                                       |                                          | O21872; PORTL_BPLSK<br>Probable portal protein<br>(100.0/3.50e-40)                                                                                                                                                                              |                            |
| 4 | 3329 | 3913 | + | capsid maturation protease<br>[ <i>PaeniBacillus</i> phage Dragolir]<br><br>prohead protease [ <i>Bacillus</i> phage J5a]<br><br>prohead protease [ <i>Bacillus</i> phage z1a]                                   | 2.0e-42<br><br>2.0e-41<br><br>4.0e-41    | Peptidase_S78<br>(14-174)                                                             | 2.53e-72                                 | COG3740; COG3740; Phage<br>head maturation protease<br>(99.96/2.30e-27)<br><br>P49860; PRO_BPHK7<br>Prohead protease<br>(99.93/7.40e-24)<br><br>D3WAC4; PRO_BPLP2<br>Probable capsid maturation<br>protease (99.89/7.70e-21)                    | prohead<br>protease        |
| 5 | 3930 | 5114 | + | TPA: MAG TPA: major capsid protein<br>[ <i>Siphoviridae</i> sp.]<br><br>TPA: MAG TPA: major capsid protein<br>[ <i>Siphoviridae</i> sp.]<br><br>TPA: MAG TPA: major capsid protein<br>[ <i>Siphoviridae</i> sp.] | 3.0e-165<br><br>2.0e-164<br><br>1.0e-159 | major_cap_HK9<br>7(3-390)<br><br>Phage_capsid(12<br>4-389)<br><br>COG4653(88-<br>394) | 1.23e-68<br><br>1.64e-48<br><br>3.02e-10 | COG4653; COG4653;<br>Predicted phage phi-C31<br>gp36 major capsid-like<br>protein (100.0/1.10e-35)<br><br>P49861; CAPSD_BPHK7<br>Major capsid protein<br>(100.0/1.00e-33)<br><br>Q6QGD8; CAPSD_BPT5<br>Major capsid protein<br>(100.0/3.60e-32) | major capsid<br>protein    |
| 6 | 5130 | 5387 | + | hp                                                                                                                                                                                                               | hp                                       | -                                                                                     | -                                        | d1xp8a2; d.48.1.1 (A:283-341)<br>RecA protein, C-terminal<br>domain (90.72/4.60e-01)                                                                                                                                                            | hp                         |
| 7 | 5384 | 5656 | + | DNA packaging protein [ <i>PaeniBacillus</i><br>phage PG1]<br><br>TPA: MAG TPA: head to tail adaptor<br>[ <i>Myoviridae</i> sp.]                                                                                 | 1.0e-26<br><br>3.0e-24                   | put_DNA_pack<br>(2-88)                                                                | 5.14e-13                                 | cd08054; gp6; Head-Tail<br>Connector Protein gp6 of<br>Bacteriophage HK97 and<br>similar proteins (99.57/1.40e-<br>14)                                                                                                                          | head completion<br>protein |

|   |      |      |   |                                                                                                                                                                                                                 |                                       |                     |          |                                                                                                                                                                                                                                                 |                                        |
|---|------|------|---|-----------------------------------------------------------------------------------------------------------------------------------------------------------------------------------------------------------------|---------------------------------------|---------------------|----------|-------------------------------------------------------------------------------------------------------------------------------------------------------------------------------------------------------------------------------------------------|----------------------------------------|
|   |      |      |   | TPA: MAG TPA: head to tail adaptor<br>[ <i>Siphoviridae</i> sp.]                                                                                                                                                | 3.0e-24                               |                     |          | cd08051; gp6_gp15_like;<br>Head-Tail Connector<br>Proteins gp6 and gp15, and<br>similar proteins. Members of<br>this family include the<br>prote(99.49/1.60e-13)<br><br>Q38584; HCP15_BPSPP Head<br>completion protein gp15<br>(99.36/8.50e-12) |                                        |
| 8 | 5653 | 5952 | + | TPA: MAG TPA: head closure knob<br>[ <i>Myoviridae</i> sp.]<br><br>TPA: MAG TPA: head closure knob<br>[ <i>Myoviridae</i> sp.]<br><br>TPA: MAG TPA: head closure knob<br>[ <i>Siphoviridae</i> sp.]             | 6.0e-21<br><br>5.0e-20<br><br>1.0e-19 | gp16_SPP1<br>(2-96) | 2.78e-08 | COG5614; COG5614;<br>Bacteriophage head-tail<br>adaptor (99.87/1.20e-20)<br><br>O48446; HCP16_BPSPP Head<br>completion protein gp16<br>(99.83/1.60e-18)<br><br>O64214; VG20_BPMD2 Gene<br>20 protein (99.18/5.20e-10)                           | head completion<br>protein             |
| 9 | 5945 | 6301 | + | prophage pi2 protein 37 [ <i>Bacillus</i> phage<br>11143]<br><br>TPA: MAG TPA: putative tail<br>component [ <i>Siphoviridae</i> sp.]<br><br>TPA: MAG TPA: putative tail<br>component [ <i>Siphoviridae</i> sp.] | 2.0e-46<br><br>3.0e-35<br><br>7.0e-32 | -                   | -        | COG5005; COG5005; Mu-like<br>prophage protein gpG<br>(99.62/3.20e-15)<br><br>Q01261; GPG_BPMU<br>Putative capsid assembly<br>protein G (98.86/1.40e-08)<br><br>Q04776; YG36_BPMV4<br>Uncharacterized protein<br>ORF6 (98.55/2.30e-07)           | putative tail<br>completion<br>protein |

|    |      |       |   |                                                                                                                                                                                                                          |                                         |                                        |                          |                                                                                                                              |                                 |
|----|------|-------|---|--------------------------------------------------------------------------------------------------------------------------------------------------------------------------------------------------------------------------|-----------------------------------------|----------------------------------------|--------------------------|------------------------------------------------------------------------------------------------------------------------------|---------------------------------|
| 10 | 6298 | 6627  | + | putative aminopeptidase [uncultured <i>Caudovirales</i> phage]<br><br>TPA: MAG TPA_asm: tail component [ <i>Myoviridae</i> sp.]<br><br>TPA: MAG TPA: tail completion protein [ <i>Myoviridae</i> sp.]                    | 2.0e-62<br><br>7.0e-41<br><br>5.0e-40   | -                                      | -                        | O48448; COMPL_BPSPP Tail completion protein gp17 (98.63/9.70e-07)<br><br>O64216; VG22_BPMD2 Gene 22 protein (96.44/8.00e-02) | tail completion protein         |
| 11 | 6628 | 7221  | + | putative major tail protein [uncultured <i>Caudovirales</i> phage]<br><br>major tail protein [ <i>Bacillus</i> phage 11143]<br><br>putative major tail protein [ <i>Exiguobacterium</i> phage vB_EauS-123]               | 4.0e-128<br><br>3.0e-127<br><br>2.0e-81 | maj_tail_phi13 (5-192)                 | 2.11e-39                 | O21879; TUBE_BPLSK Tail tube protein (100.0/1.10e-31)<br><br>Q05229; VG23_BPML5 Major tail protein Gp23 (97.25/1.70e-02)     | tail tube protein               |
| 12 | 7228 | 7590  | + | prophage pi2 protein 40 [ <i>Bacillus</i> phage 11143]<br><br>TPA: MAG TPA: tail assembly chaperone protein [ <i>Siphoviridae</i> sp.]<br><br>TPA: MAG TPA_asm: tail assembly chaperone protein [ <i>Myoviridae</i> sp.] | 5.0e-37<br><br>3.0e-36<br><br>8.0e-36   | -                                      | -                        | ('-', '-')                                                                                                                   | tail assembly chaperone protein |
| 13 | 7689 | 7805  | + | TPA: MAG TPA: Ribosomal protein L14 [ <i>Myoviridae</i> sp.]<br><br>TPA: MAG TPA: Protein of unknown function (DUF1108) [ <i>Siphoviridae</i> sp.]                                                                       | 2.0e-03<br><br>2.0e-03                  | -                                      | -                        | ('-', '-')                                                                                                                   | hp                              |
| 14 | 7821 | 11453 | + | TMP repeat protein [Geo <i>Bacillus</i> phage GBSV1]<br><br>TMP repeat protein [ <i>Bacillus</i> virus 1]                                                                                                                | 0.0e+00<br><br>0.0e+00                  | YqbO (1-696)<br><br>COG5412 (601-1071) | 1.57e-48<br><br>8.00e-33 | O21882; TMP_BPLSK Probable tape measure protein (100.0/2.40e-22)                                                             | tape measure protein            |

|    |       |       |   |                                                                                                                                                                                                                               |                                       |                                                                                      |                                          |                                                                                                                                                                                                                              |                              |
|----|-------|-------|---|-------------------------------------------------------------------------------------------------------------------------------------------------------------------------------------------------------------------------------|---------------------------------------|--------------------------------------------------------------------------------------|------------------------------------------|------------------------------------------------------------------------------------------------------------------------------------------------------------------------------------------------------------------------------|------------------------------|
|    |       |       |   | putative TMP repeat protein<br>[uncultured <i>Caudovirales</i> phage]                                                                                                                                                         | 0.0e+00                               | SMC_prok_B<br>(19-571)                                                               | 1.38e-08                                 | Q0PDK7; TMP_BPSP Tail<br>tape measure protein gp18<br>(99.97/2.00e-20)<br><br>E7DNB6; TMP_BPDP1 Tape<br>measure protein (99.97/9.90e-<br>20)                                                                                 |                              |
| 15 | 11495 | 12952 | + | tail family protein [ <i>Bacillus</i> phage<br>vB_BtS_BMBtp3]<br><br>tail family protein [ <i>Bacillus</i> phage<br>phi4J1]<br><br>tail family protein [Staphylococcus<br>phage SpaA1]                                        | 0.0e+00<br><br>0.0e+00<br><br>0.0e+00 | Sipho_tail<br>(16-189)<br><br>phi3626_gp14_<br>N<br>(4-127)<br><br>YomH<br>(4-181)   | 3.73e-34<br><br>4.02e-34<br><br>2.05e-20 | COG4722; YomH; Phage-<br>related protein (99.82/1.50e-<br>18)<br><br>O48459; DIT_BPSP Distal<br>tail protein (99.8/6.70e-18)<br><br>O64221; VG27_BPMD2<br>Minor tail protein Gp27<br>(99.44/5.20e-12)                        | distal tail<br>protein       |
| 16 | 12949 | 17331 | + | putative minor structural protein<br>[uncultured <i>Caudovirales</i> phage]<br><br>tail fiber domain-containing protein<br>[ <i>Bacillus</i> phage phi4B1]<br><br>minor structural protein [ <i>Bacillus</i><br>phage phi4J1] | 0.0e+00<br><br>0.0e+00<br><br>0.0e+00 | put_anti_recept<br>(29-351)<br><br>Prophage_tail<br>(97-323)<br><br>Tar<br>(355-593) | 7.46e-70<br><br>3.06e-15<br><br>5.53e-08 | Q0PDK6; FIBER_BPSP Tail<br>spike protein (99.96/5.90e-27)<br><br>COG4926; PblB; Phage-<br>related protein (99.9/5.60e-<br>22)<br><br>A8E283; VPN7_BPPHE Tail<br>fiber protein (99.74/9.50e-16)                               | tail fiber protein           |
| 17 | 17347 | 17724 | + | hp                                                                                                                                                                                                                            | hp                                    | -                                                                                    | -                                        | COG2002; AbrB; Bifunctional<br>DNA-binding transcriptional<br>regulator of<br>stationary/sporulation/toxin<br>gene expression and<br>antitoxin c(99.19/7.80e-11)<br>d2fy9a1; b.129.1.3 (A:1-54)<br>Putative transition state | transcriptional<br>regulator |

|    |       |       |   |                                                                                                                                                                                                                                                |                                               |                                                                       |                                                 |                                                                                                                                                                                                                                                                                                                      |                                    |
|----|-------|-------|---|------------------------------------------------------------------------------------------------------------------------------------------------------------------------------------------------------------------------------------------------|-----------------------------------------------|-----------------------------------------------------------------------|-------------------------------------------------|----------------------------------------------------------------------------------------------------------------------------------------------------------------------------------------------------------------------------------------------------------------------------------------------------------------------|------------------------------------|
|    |       |       |   |                                                                                                                                                                                                                                                |                                               |                                                                       |                                                 | regulator ABH (98.69/2.20e-07)                                                                                                                                                                                                                                                                                       |                                    |
|    |       |       |   |                                                                                                                                                                                                                                                |                                               |                                                                       |                                                 | d1yfb_a; b.129.1.3 (A:)<br>Transcription-state regulator<br>AbrB, the N-terminal DNA<br>recognition domain { <i>Bacillus subtilis</i> [TaxId:<br>1423(98.47/1.80e-06)                                                                                                                                                |                                    |
| 18 | 17761 | 18186 | + | <p>holin family protein [<i>Bacillus</i> phage phi4J1]</p> <p>holin [<i>Bacillus</i> phage BVE2]</p> <p>holin [<i>Bacillus</i> phage vB_BtS_BMBtp13]</p>                                                                                       | <p>2.0e-87</p> <p>1.0e-86</p> <p>3.0e-86</p>  | <p>Phage_holin_4_1<br/>(22-127)</p>                                   | <p>1.84e-37</p>                                 | <p>COG4824; COG4824; Phage-related holin (Lysis protein) (99.96/9.10e-28)</p> <p>Q9ZXD8; VLYS_BPPH1<br/>Probable holin (99.96/6.60e-27)</p> <p>P07539; HOLIN_BPPZA<br/>Antiholin (99.93/5.10e-24)</p>                                                                                                                | holin                              |
| 19 | 18186 | 19118 | + | <p>N-acetylmuramoyl-L-alanine amidase [<i>Bacillus</i> phage Waukesha92]</p> <p>N-acetylmuramoyl-L-alanine amidase [<i>Bacillus</i> phage vB_BthS-TP21T]</p> <p>N-acetylmuramoyl-L-alanine amidase [<i>Bacillus</i> phage vB_BthS-HD29phi]</p> | <p>0.0e+00</p> <p>0.0e+00</p> <p>6.0e-128</p> | <p>CwlA (3-167)</p> <p>PGRP (22-141)</p> <p>sporang_Gsm (186-307)</p> | <p>2.24e-56</p> <p>2.38e-25</p> <p>9.29e-09</p> | <p>d1yb0a1; d.118.1.1 (A:1-157)<br/>N-acetylmuramoyl-L-alanine amidase PlyG (99.85/2.70e-19)</p> <p>COG5632; CwlA; N-acetylmuramoyl-L-alanine amidase CwlA [Cell wall/membrane/envelope biogenesis] (99.74/4.80e-16)</p> <p>d2cb3a1; d.118.1.1 (A:174-344) Peptidoglycan-recognition protein-LE (99.63/3.00e-15)</p> | N-acetylmuramoyl-L-alanine amidase |



|    |       |       |   |                                                                                                                                                         |                    |                        |          |                                                                                                                                                                                                                                                                                                                                                |                               |
|----|-------|-------|---|---------------------------------------------------------------------------------------------------------------------------------------------------------|--------------------|------------------------|----------|------------------------------------------------------------------------------------------------------------------------------------------------------------------------------------------------------------------------------------------------------------------------------------------------------------------------------------------------|-------------------------------|
| 20 | 19384 | 20019 | + | -                                                                                                                                                       | -                  | -                      | -        | ('-', '-')                                                                                                                                                                                                                                                                                                                                     | hp                            |
| 21 | 20044 | 20220 | + | -                                                                                                                                                       | -                  | -                      | -        | ('-', '-')                                                                                                                                                                                                                                                                                                                                     | hp                            |
| 22 | 20213 | 20848 | + | PIN domain protein [ <i>CaldiBacillus</i> phage CBP1]<br>MULTISPECIES: type II toxin-antitoxin system VapC family toxin [ <i>Bacillus cereus</i> group] | 2.0e-06<br>5e-129  | PIN_VapC-like (23-174) | 2.03e-04 | COG5573; COG5573; Predicted nucleic acid-binding protein, contains PIN domain [General function prediction only] (99.56/9.90e-13)<br>d1w8ia_; c.120.1.1 (A:) Hypothetical protein AF1683 (99.46/1.80e-12)<br>COG5378; COG5378; Predicted nucleic acid-binding protein, contains PIN domain [General function prediction only] (99.45/7.80e-12) | PIN domain-containing protein |
| 23 | 21363 | 21040 | - | hp                                                                                                                                                      | hp                 | -                      | -        | Q9YJQ8; TIO_ATHV3 Protein tio (86.6/7.80e-01)                                                                                                                                                                                                                                                                                                  | hp                            |
| 24 | 21504 | 21722 | + | hp                                                                                                                                                      | hp                 | -                      | -        | COG2378; YafY; Predicted DNA-binding transcriptional regulator YafY, contains an HTH and WYL domains [Transcription] (99.11/4.50e-09)                                                                                                                                                                                                          | transcriptional regulator     |
| 25 | 21747 | 22037 | + | YolD-like family protein [ <i>PaeniBacillus</i> phage Diva]<br>YolD-like protein [ <i>PaeniBacillus</i> phage Xenia]                                    | 4.0e-06<br>4.0e-06 | YolD (19-92)           | 2.36e-04 | d1sg5a1; b.137.1.2 (A:1-86) Inhibitor of Rho Rof { <i>Escherichia coli</i> [TaxId: 562]} (95.69/2.30e-01)                                                                                                                                                                                                                                      | YolD-like family protein      |

|    |       |       |   |                                                                                                                                                                                                                        |                                                |                                                                                          |                                                 |                                                                                                                                                                                                                                                                  |                                        |
|----|-------|-------|---|------------------------------------------------------------------------------------------------------------------------------------------------------------------------------------------------------------------------|------------------------------------------------|------------------------------------------------------------------------------------------|-------------------------------------------------|------------------------------------------------------------------------------------------------------------------------------------------------------------------------------------------------------------------------------------------------------------------|----------------------------------------|
|    |       |       |   | YolD-like protein [ <i>PaeniBacillus</i> phage Fern]                                                                                                                                                                   | 6.0e-06                                        |                                                                                          |                                                 |                                                                                                                                                                                                                                                                  |                                        |
| 26 | 22884 | 22054 | - | <p>helix_turn_helix protein [<i>Bacillus</i> phage BM5]</p> <p>putative cytosolic protein [<i>Bacillus</i> phage vB_BspM_MarvelLand]</p> <p>DNA binding protein [<i>Bacillus</i> phage Spock]</p>                      | <p>2.0e-115</p> <p>2.0e-111</p> <p>2.0e-99</p> | -                                                                                        | -                                               | <p>COG5529; COG5529; Pyocin large subunit [Secondary metabolites biosynthesis, transport and catabolism] (98.39/2.60e-06)</p> <p>P19654; REPL_BPP1 Replication protein repL (98.02/3.70e-05)</p> <p>P03688; VRPO_LAMBD Replication protein O (97.7/1.10e-04)</p> | HTH domain-containing protein          |
| 27 | 24435 | 23272 | - | <p>site-specific integrase [<i>Bacillus</i> phage phi4B1]</p> <p>integrase [<i>Bacillus</i> phage BMBtp1]</p> <p>tyrosine recombinase XerC [Brevi<i>Bacillus</i> phage Emery]</p>                                      | <p>0.0e+00</p> <p>0.0e+00</p> <p>2.0e-104</p>  | <p>INT_ICEBs1_C_ like (174-359)</p> <p>XerC (55-379)</p> <p>Phage_int_SAM_3 (63-117)</p> | <p>1.04e-46</p> <p>1.93e-15</p> <p>4.84e-11</p> | <p>P37317; VINT_BPSFV Integrase (100.0/2.20e-38)</p> <p>P25426; VINT_BPMFR Integrase (100.0/5.30e-38)</p> <p>P08320; VINT_BPP4 Integrase (100.0/5.10e-37)</p>                                                                                                    | site-specific integrase                |
| 28 | 24930 | 24505 | - | <p>repressor protein [<i>Bacillus</i> phage BMBtp1]</p> <p>ImmA/IrrE family metallo-endopeptidase [<i>Bacillus</i> phage phi4B1]</p> <p>ImmA/IrrE family metallo-endopeptidase [<i>Listeria</i> phage vB_LmoS_188]</p> | <p>5.0e-100</p> <p>4.0e-93</p> <p>7.0e-47</p>  | ImmA (8-141)                                                                             | 7.91e-25                                        | <p>P10426; YIM2_BPPH1 Uncharacterized immunity region protein 2 (99.92/1.50e-22)</p> <p>COG2856; ImmA; Zn-dependent peptidase ImmA, M78 family [Posttranslational modification, protein</p>                                                                      | ImmA/IrrE family metallo-endopeptidase |

|    |       |       |   |                                                                                                                                                                                                                                               |                                              |                                                  |                                 |                                                                                                                                                                                                                                                                                                   |                                                        |
|----|-------|-------|---|-----------------------------------------------------------------------------------------------------------------------------------------------------------------------------------------------------------------------------------------------|----------------------------------------------|--------------------------------------------------|---------------------------------|---------------------------------------------------------------------------------------------------------------------------------------------------------------------------------------------------------------------------------------------------------------------------------------------------|--------------------------------------------------------|
|    |       |       |   |                                                                                                                                                                                                                                               |                                              |                                                  |                                 | turnover, chaperones]<br>(99.86/6.00e-20)                                                                                                                                                                                                                                                         |                                                        |
|    |       |       |   |                                                                                                                                                                                                                                               |                                              |                                                  |                                 | COG3800; COG3800;<br>Predicted transcriptional<br>regulator [General function<br>prediction only] (99.8/2.50e-<br>18)                                                                                                                                                                             |                                                        |
| 29 | 25368 | 24946 | - | <p>Cro/CI family transcriptional regulator<br/>[<i>Bacillus</i> phage BMBtp1]</p> <p>DNA-binding helix-turn-helix protein<br/>[<i>Bacillus</i> phage phi4B1]</p> <p>TPA: MAG TPA: repressor protein<br/>[<i>Siphoviridae</i> sp.]</p>         | <p>8.0e-68</p> <p>3.0e-66</p> <p>4.0e-49</p> | <p>HTH_XRE<br/>(5-59)</p> <p>HipB<br/>(2-88)</p> | <p>1.70e-08</p> <p>6.22e-04</p> | <p>P06153; RPC_BPPH1<br/>Immunity repressor protein<br/>(99.1/1.40e-07)</p> <p>P04132; RPC_BPP2 Repressor<br/>protein C (98.46/3.80e-06)</p> <p>COG5606; COG5606;<br/>Predicted DNA-binding<br/>protein, XRE-type HTH<br/>domain [General function<br/>prediction only] (98.23/1.80e-<br/>05)</p> | transcriptional<br>regulator<br>(repressor<br>protein) |
| 30 | 25640 | 25825 | + | <p>transcriptional regulator [<i>Bacillus</i><br/>phage phi4B1]</p> <p>helix-turn-helix transcriptional<br/>regulator [Staphylococcus virus<br/>phiETA2]</p> <p>helix-turn-helix transcriptional<br/>regulator [Staphylococcus virus 187]</p> | <p>8.0e-20</p> <p>3.0e-10</p> <p>4.0e-10</p> | -                                                | -                               | <p>P04132; RPC_BPP2 Repressor<br/>protein C (98.9/5.70e-08)</p> <p>d2icta_; a.35.1.3 (A:)<br/>Antitoxin HigA {Escherichia<br/>coli [TaxId: 562]}<br/>(98.32/8.40e-06)</p> <p>COG5606; COG5606;<br/>Predicted DNA-binding<br/>protein, XRE-type HTH<br/>domain [General function</p>               | transcriptional<br>regulator<br>(repressor<br>protein) |

|    |       |       |   |                                                                                                                                                                                                                                             |                                                |                 |          |                                                                                                                                                                                                                                                                                                                                   |                                                   |
|----|-------|-------|---|---------------------------------------------------------------------------------------------------------------------------------------------------------------------------------------------------------------------------------------------|------------------------------------------------|-----------------|----------|-----------------------------------------------------------------------------------------------------------------------------------------------------------------------------------------------------------------------------------------------------------------------------------------------------------------------------------|---------------------------------------------------|
|    |       |       |   |                                                                                                                                                                                                                                             |                                                |                 |          | prediction only] (98.14/2.70e-05)                                                                                                                                                                                                                                                                                                 |                                                   |
| 31 | 25825 | 26097 | + | <p>DUF771 domain-containing protein [<i>Bacillus</i> phage phi4B1]</p> <p>TPA: MAG TPA: protein of unknown function (DUF771) [<i>Siphoviridae</i> sp.]</p> <p>DUF771 domain-containing protein [Staphylococcus phage vB_SauS-phiIPLA88]</p> | <p>4.0e-53</p> <p>5.0e-06</p> <p>4.0e-03</p>   | DUF771 (32-90)  | 2.16e-10 | <p>COG4707; COG4707; Prophage pi2 protein 07 [Mobilome: prophages, transposons] (99.77/1.10e-18)</p> <p>P25135; VG090_BPPF1 10.1 kDa protein OS=Pseudomonas phage Pf1 OX=2011081 PE=4 SV=1(98.63/5.10e-08)</p> <p>d1j9ia_; a.6.1.5 (A:) Terminase gpNU1 subunit domain {Bacteriophage lambda [TaxId: 10710]} (98.61/1.10e-07)</p> | DUF771 domain-containing protein                  |
| 32 | 26112 | 26267 | + | <p>putative NHN endonuclease [<i>Bacillus</i> phage vB_<i>Bacillus</i>_1020A]</p> <p>gp68 [Listeria phage B054]</p> <p>TPA: MAG TPA: Metallo-beta-lactamase superfamily [<i>Myoviridae</i> sp.]</p>                                         | <p>6.0e-13</p> <p>1.0e-07</p> <p>2.0e-06</p>   | -               | -        | <p>Q914G0; Y072_SIFVH Uncharacterized protein 72 (68.48/4.10e+00)</p>                                                                                                                                                                                                                                                             | hp                                                |
| 33 | 26284 | 27102 | + | <p>ORF6C domain-containing protein [<i>Bacillus</i> phage phi4]1]</p> <p>antirepressor [<i>Bacillus</i> phage BMBtp1]</p> <p>antirepressor-like protein [<i>Bacillus</i> thuringiensis phage MZTP02]</p>                                    | <p>0.0e+00</p> <p>2.0e-174</p> <p>6.0e-149</p> | ORF6C (147-259) | 2.19e-31 | <p>P03037; RANT_BPP22 Antirepressor protein ant (98.17/5.00e-05)</p> <p>COG3646; pRha; Phage regulatory protein Rha [Mobilome: prophages, transposons] (97.36/3.80e-04)</p>                                                                                                                                                       | transcriptional regulator (antirepressor protein) |

|     |       |       |   |                                                                                                                                                                                                          |                                        |                                                |                          |                                                                                                                                                                                    |                                      |
|-----|-------|-------|---|----------------------------------------------------------------------------------------------------------------------------------------------------------------------------------------------------------|----------------------------------------|------------------------------------------------|--------------------------|------------------------------------------------------------------------------------------------------------------------------------------------------------------------------------|--------------------------------------|
|     |       |       |   |                                                                                                                                                                                                          |                                        |                                                |                          | P19655; ANT_BPP1<br>Antirepressor protein 1<br>(97.08/7.10e-03)                                                                                                                    |                                      |
| 34  | 27114 | 27302 | + | hp                                                                                                                                                                                                       | hp                                     | -                                              | -                        | COG4803; COG4803;<br>Uncharacterized membrane<br>protein [Function unknown]<br>(76.57/7.70e+00)                                                                                    | hp                                   |
| 35  | 27329 | 27763 | + | replication terminator protein<br>[AeriBacillus phage AP45]<br><br>replication terminator protein<br>[PaeniBacillus phage Vegas]<br><br>replication terminator protein<br>[PaeniBacillus phage Dragolir] | 6.0e-39<br><br>7.0e-28<br><br>1.0e-27  | -                                              | -                        | ('-', '-')                                                                                                                                                                         | replication<br>terminator<br>protein |
| 36  | 27782 | 28495 | + | hp                                                                                                                                                                                                       | hp                                     | -                                              | -                        | COG5532; yfdQ;<br>Uncharacterized conserved<br>protein YfdQ, DUF2303<br>family [Function<br>unknown].(94.21/5.40e+00)                                                              | hp                                   |
| 37* | 28495 | 28710 | + | hp                                                                                                                                                                                                       | hp                                     | -                                              | -                        | cd14652; Seven_helix_coil<br>Seven_helix_coil. other<br>structures are fusion proteins<br>(84.14/9.80e-01)                                                                         | hp                                   |
| 38  | 29077 | 30012 | + | putative replication protein<br>[uncultured Caudovirales phage]<br><br>replication initiation protein [Bacillus<br>phage BMBtp1]<br><br>DnaD domain protein [Bacillus phage<br>phi4J1]                   | 0.0e+00<br><br>0.0e+00<br><br>1.0e-162 | DnaD<br>(144-287)<br><br>DnaD_dom<br>(184-245) | 7.70e-15<br><br>4.17e-13 | COG3935; DnaD; DNA<br>replication protein DnaD<br>[Replication, recombination<br>and repair] (99.27/1.30e-10)<br><br>P03688; VRPO_LAMBD<br>Replication protein<br>(98.21/2.00e-06) | DNA replication<br>protein DnaD      |

|    |       |       |   |                                                                                                                                                                                 |                                       |   |   |                                                                                                                                                                                                                                                                                                                                    |    |
|----|-------|-------|---|---------------------------------------------------------------------------------------------------------------------------------------------------------------------------------|---------------------------------------|---|---|------------------------------------------------------------------------------------------------------------------------------------------------------------------------------------------------------------------------------------------------------------------------------------------------------------------------------------|----|
|    |       |       |   |                                                                                                                                                                                 |                                       |   |   | COG3611; DnaB; Replication initiation and membrane attachment protein DnaB [Replication, recombination and repair] (98.5/4.90e-06)                                                                                                                                                                                                 |    |
| 39 | 30024 | 30503 | + | putative structural protein [Vibrio phage vB_VpP_DE10]                                                                                                                          | 3.0e-04                               | - | - | P15854; GP166_BPPH5 Gene product 16.6 (94.63/5.80e-03)<br><br>COG1675; TFA1; Transcription initiation factor IIE, alpha subunit [Transcription] (94.83/2.10e-02)<br><br>d1zina2; g.41.2.1 (A:126-160) Microbial and mitochondrial ADK, insert "zinc finger" domain { <i>Bacillus stearothermophilus</i> [TaxId: 1(91.79/4.60e-02)] | hp |
| 40 | 30496 | 30726 | + | hp                                                                                                                                                                              | hp                                    | - | - | (';', '-')                                                                                                                                                                                                                                                                                                                         | hp |
| 41 | 30750 | 31307 | + | lysozyme-like protein [ <i>Bacillus</i> phage vB_BtS_BMBtp14]<br><br>gp38 [ <i>Bacillus</i> phage TP21-L]<br><br>TPA: MAG TPA: PVL ORF 50 like protein [ <i>Myoviridae</i> sp.] | 1.0e-84<br><br>1.0e-77<br><br>4.0e-19 | - | - | d1rh6a_; a.6.1.7 (A:) Excisionase Xis (89.7/5.10e-01)                                                                                                                                                                                                                                                                              | hp |
| 42 | 31346 | 31780 | + | hp                                                                                                                                                                              | hp                                    | - | - | Q02406; Y12J_BPT4 Uncharacterized 7.3 kDa protein in Gp30-rIII intergenic region (93.52/2.40e-01)                                                                                                                                                                                                                                  | hp |

|    |       |       |   |                                                                                                                                                                                         |                                                 |                                                                               |                                                 |                                                                                                                                                                                                                                                                                                               |                                                                                                                                                                |
|----|-------|-------|---|-----------------------------------------------------------------------------------------------------------------------------------------------------------------------------------------|-------------------------------------------------|-------------------------------------------------------------------------------|-------------------------------------------------|---------------------------------------------------------------------------------------------------------------------------------------------------------------------------------------------------------------------------------------------------------------------------------------------------------------|----------------------------------------------------------------------------------------------------------------------------------------------------------------|
| 43 | 31905 | 32441 | + | <p>putative dUTPase [uncultured <i>Caudovirales</i> phage]</p> <p>dUTP diphosphatase [<i>Bacillus</i> phage vB_BtS_BMBtp3]</p> <p>dUTPase [<i>Bacillus</i> phage vB_BthS-TP21T]</p>     | <p>1.0e-117</p> <p>7.0e-24</p> <p>1.0e-22</p>   | <p>dUTPase_2 (7-178)</p> <p>NTP-PPase_dUTPase (11-93)</p> <p>Dut2 (6-178)</p> | <p>2.91e-23</p> <p>1.67e-18</p> <p>5.30e-13</p> | <p>COG4508; Dut2; Dimeric dUTPase, all-alpha-NTP-PPase (MazG) superfamily [Nucleotide transport and metabolism].(100.0/2.20e-32)</p> <p>d1w2ya_ ; a.204.1.1 (A:) Type II deoxyuridine triphosphatase (99.96/1.40e-28)</p> <p>d1ogla_ ; a.204.1.1 (A:) Type II deoxyuridine triphosphatase (99.9/1.30e-22)</p> | dUTPase                                                                                                                                                        |
| 44 | 32461 | 32601 | + | hp                                                                                                                                                                                      | hp                                              | -                                                                             | -                                               | KOG3637; Vitronectin receptor, alpha subunit [Extracellular structures] (83.84/1.50e+00)                                                                                                                                                                                                                      | hp                                                                                                                                                             |
| 45 | 32603 | 33394 | + | <p>HflC/HflK family inner membrane protein [<i>Bacillus</i> phage Spock]</p> <p>band 7 protein [<i>Bacillus</i> phage B4]</p> <p>membrane protein [<i>Bacillus</i> phage BigBertha]</p> | <p>8.0e-161</p> <p>1.0e-158</p> <p>5.0e-152</p> | <p>SPFH_prohibitin (27-225)</p> <p>HflC (1-230)</p> <p>PHB (25-191)</p>       | <p>6.62e-47</p> <p>1.62e-09</p> <p>6.24e-05</p> | <p>KOG3083; Prohibitin [Posttranslational modification, protein turnover, chaperones] (100.0/6.90e-35)</p> <p>KOG3090; Prohibitin-like protein [Posttranslational modification, protein turnover, chaperones] (100.0/4.50e-34)</p> <p>KOG2621; Prohibitins and stomatins of the PID superfamily [Energy</p>   | <p>SPFH domain-containing membrane protein (Prediction: Signal peptide (Sec/SPI)</p> <p>Cleavage site between pos. 35 and 36: GHA-GV. Probability: 0.3497)</p> |

|    |       |       |   |                                                                                                                                                                                                                                               |                                               |                                                                       |                                                 |                                                                                                                                                                                                                                                                                                         |                                             |
|----|-------|-------|---|-----------------------------------------------------------------------------------------------------------------------------------------------------------------------------------------------------------------------------------------------|-----------------------------------------------|-----------------------------------------------------------------------|-------------------------------------------------|---------------------------------------------------------------------------------------------------------------------------------------------------------------------------------------------------------------------------------------------------------------------------------------------------------|---------------------------------------------|
|    |       |       |   |                                                                                                                                                                                                                                               |                                               |                                                                       |                                                 | production and conversion]<br>(100.0/7.40e-30)                                                                                                                                                                                                                                                          |                                             |
| 46 | 33419 | 34006 | + | <p>putative recombination protein U<br/>[uncultured <i>Caudovirales</i> phage]</p> <p>Holliday junction resolvase RecU<br/>[Staphylococcus phage SpaA1]</p> <p>putative recombination protein U<br/>[<i>Bacillus</i> phage vB_BtS_BMBtp3]</p> | <p>2.0e-122</p> <p>2.0e-85</p> <p>2.0e-84</p> | RecU<br>(28-188)                                                      | 4.66e-59                                        | <p>COG3331; PrfA; Penicillin-binding protein-related factor A, putative recombinase (100.0/9.00e-34)</p> <p>d1rzna_; c.52.1.28 (A:) Recombination protein U (RecU)/PBP related factor A (PrfA) (100.0/4.10e-32)</p> <p>d1ob8a_; c.52.1.18 (A:) Holliday-junction resolvase SSO1176 (99.19/6.70e-10)</p> | Holliday junction resolvase RecU            |
| 47 | 34003 | 34326 | + | Zn-finger protein fused to HTH domain [Staphylococcus phage SpaA1]                                                                                                                                                                            | 2.0e-22                                       | -                                                                     | -                                               | <p>d1ijwc_; a.4.1.2 (C:) HIN recombinase (DNA-binding domain) (98.11/1.90e-05)</p> <p>d1gdta1; a.4.1.2 (A:141-183) gamma,delta resolvase (C-terminal domain) (97.86/1.10e-04)</p> <p>d1rr7a_; a.4.1.14 (A:) Middle operon regulator, Mor (97.91/1.90e-04)</p>                                           | hp                                          |
| 48 | 34458 | 34967 | + | <p>putative sigma-70 family RNA polymerase sigma factor [uncultured <i>Caudovirales</i> phage]</p> <p>sigma-70 family RNA polymerase sigma factor [<i>Bacillus</i> phage Waukesha92]</p>                                                      | <p>3.0e-94</p> <p>2.0e-53</p>                 | <p>PRK06930 (1-168)</p> <p>sigma70-ECF (77-161)</p> <p>Sigma70_r4</p> | <p>6.59e-61</p> <p>2.48e-09</p> <p>5.48e-09</p> | <p>d1or7a1; a.4.13.2 (A:120-187) SigmaE factor (RpoE) (98.44/5.80e-06)</p> <p>P06227; RP34_BPSP1 RNA polymerase sigma GP34 factor (98.33/7.10e-06)</p>                                                                                                                                                  | sigma-70 family RNA polymerase sigma factor |



|    |       |       |   |                                                                                                                                                                                                                                                                                              |                                       |               |          |                                                                                                                                                                                                                                                                                                                            |                                      |
|----|-------|-------|---|----------------------------------------------------------------------------------------------------------------------------------------------------------------------------------------------------------------------------------------------------------------------------------------------|---------------------------------------|---------------|----------|----------------------------------------------------------------------------------------------------------------------------------------------------------------------------------------------------------------------------------------------------------------------------------------------------------------------------|--------------------------------------|
|    |       |       |   | sigma-70 family RNA polymerase<br>sigma factor [ <i>Bacillus</i> phage<br>vB_BtS_BMBtp3]                                                                                                                                                                                                     | 5.0e-53                               | (104-157)     |          | d1ttya_; a.4.13.2 (A:) Sigma70<br>(SigA, RpoD) (98.29/9.20e-06)                                                                                                                                                                                                                                                            |                                      |
| 49 | 35421 | 35630 | + | hp                                                                                                                                                                                                                                                                                           | hp                                    | -             | -        | ('-', '-')                                                                                                                                                                                                                                                                                                                 | hp                                   |
| 50 | 35696 | 35875 | + | hp                                                                                                                                                                                                                                                                                           | hp                                    | -             | -        | Q9J555; A13_FOWPN Virion<br>membrane protein A13<br>homolog (80.17/6.70e+00)                                                                                                                                                                                                                                               | hp                                   |
| 51 | 35877 | 36089 | + | DNA-binding protein [ <i>Bacillus</i> phage<br>Deep-Purple]<br><br>helix turn helix domain protein<br>[ <i>CaldiBacillus</i> phage CBP1]<br><br>DNA-protecting protein DprA<br>[ <i>Thermus</i> phage phi OH2]                                                                               | 2.0e-23<br><br>5.0e-10<br><br>3.0e-06 | HTH_17(20-66) | 1.59e-04 | d1j9ia_; a.6.1.5 (A:) Terminase gpNU1 subunit<br>domain (99.04/6.90e-09)<br><br>P25135; VG090_BPPF1 10.1<br>kDa protein (98.96/1.40e-08)<br><br>P51705; VCOX_BPHC1<br>Regulatory protein cox<br>(98.86/2.30e-08)                                                                                                           | HTH domain-<br>containing<br>protein |
| 52 | 36147 | 36449 | + | TPA: MAG TPA: HNH endonuclease<br>[ <i>Siphoviridae</i> sp.]<br><br>TPA: MAG TPA: HNH endonuclease<br>bacteriophage, HNH Endonuclease,<br>DNA.52A [ <i>Siphoviridae</i> sp.]<br><br>TPA: MAG TPA: HNH endonuclease<br>bacteriophage, HNH Endonuclease,<br>DNA.52A [ <i>Siphoviridae</i> sp.] | 2.0e-37<br><br>4.0e-32<br><br>5.0e-32 | -             | -        | d4ogca2; d.4.1.8 (A:513-673)<br>CRISPR-associated<br>endonuclease Cas9/Csn1,<br>HNH domain (97.74/9.40e-<br>05)<br><br>d5axwa2; d.4.1.8 (A:484-630)<br>CRISPR-associated<br>endonuclease Cas9/Csn1,<br>HNH domain (97.19/1.50e-<br>03)<br><br>d4oo8a2; d.4.1.8 (A:775-907)<br>CRISPR-associated<br>endonuclease Cas9/Csn1, | HNH<br>endonuclease                  |

|    |       |       |   |    |    |   |   |                             |    |
|----|-------|-------|---|----|----|---|---|-----------------------------|----|
|    |       |       |   |    |    |   |   | HNH domain (97.08/1.80e-03) |    |
| 53 | 36452 | 36847 | + | hp | hp | - | - | ('-', '-')                  | hp |

\* – CDS37 (locus\_tag: phageB13\_37; protein\_id U UW40223; location 28495-28710), predicted by RAST, encodes a hypothetical protein. There is an alternative overlapping CDS which was discovered manually and is located downstream (28463-28981) of the RAST-predicted CDS37. The alternative CDS has an RBS that is slightly closer to the proposed start codon compared with the RBS of the RAST-predicted CDS37. Since both the RAST-predicted and alternative CDSs encode hypothetical proteins, it is very difficult to tell which one is the real gene.

Table S3. The large terminase subunit proteins of B13 and phages with well-studied DNA packaging mechanisms used for phylogenetic inference.

| Terminus type                 |                                      | Phage                                | Number GenBank<br>(terminase large subunit) | Source |
|-------------------------------|--------------------------------------|--------------------------------------|---------------------------------------------|--------|
| Exact direct terminal repeats | Short direct terminal repeats (T7)   | <i>Pseudomonas</i> phage Pf-10       | YP_009145642.1                              | [3]    |
|                               |                                      | <i>Enterobacteria</i> phage T7       | QRE00040.1                                  | [4]    |
|                               |                                      | <i>Enterobacteria</i> phage T3       | YP_009792972.1                              | [5]    |
|                               |                                      | <i>Yersinia</i> phage phiYeO3-12     | NP_052122.1                                 | [6]    |
|                               |                                      | <i>Pseudomonas</i> phage phi15       | YP_004286227.1                              | [7]    |
|                               |                                      | <i>Pseudomonas</i> phage PFP1        | YP_009804025.1                              | [8]    |
|                               | Short direct terminal repeats (N4)   | <i>Escherichia</i> phage N4          | YP_950546.1                                 | [9]    |
|                               |                                      | <i>Achromobacter</i> phage JWDelta   | AHC56597.1                                  | [10]   |
|                               |                                      | <i>Erwinia</i> phage vB_EamP-S6      | YP_007005834.1                              | [11]   |
|                               | Short direct terminal repeats (c-st) | <i>Clostridium</i> phage c-st        | YP_398598.1                                 | [12]   |
|                               |                                      | <i>Bacillus</i> phage Izhevsk        | QIW89903.1                                  | [13]   |
|                               |                                      | <i>Bacillus</i> phage vB_BanS-Tsamsa | AGI11737.1                                  | [14]   |
|                               |                                      | <i>Bacillus</i> phage Basilisk       | AGR46580.1                                  | [15]   |
|                               | Long DTRs (SPO1)                     | <i>Bacillus</i> virus SPO1           | YP_002300330.1                              | [16]   |
|                               |                                      | <i>Listeria</i> phage A511           | YP_001468454.1                              | [17]   |
|                               |                                      | <i>Brochothrix</i> phage A9          | YP_004301396.1                              | [18]   |
|                               | Long DTRs (T5)                       | <i>Enterobacteria</i> phage T5       | YP_006983.1                                 | [4]    |
|                               |                                      | <i>Salmonella</i> virus SPC35        | YP_004306624.1                              | [19]   |
|                               |                                      | <i>Providencia</i> phage vB_PreS_PR1 | YP_009599184.1                              | [20]   |
| Cohesive ends                 | 5'cos ends (lambda)                  | Bacteriophage N15                    | NP_046897.1                                 | [21]   |
|                               |                                      | <i>Enterobacteria</i> phage lambda   | NP_040581.1                                 | [4]    |
|                               | 5'cos ends (P2)                      | <i>Escherichia</i> virus P2          | NP_046758.1                                 | [4,22] |
|                               |                                      | <i>Escherichia</i> virus 186         | NP_052251.1                                 | [23]   |
|                               |                                      | <i>Pseudomonas</i> phage phiCTX      | NP_490600.1                                 | [24]   |
|                               | 3'cos ends (HK97)                    | <i>Escherichia</i> virus HK97        | NP_037698.1                                 | [25]   |
|                               |                                      | <i>Escherichia</i> virus HK022       | NP_037663.1                                 | [25]   |
|                               |                                      | <i>RHizobium</i> phage 16-3          | YP_002117560.1                              | [26]   |

|                                                    |                                        |                                      |                |         |
|----------------------------------------------------|----------------------------------------|--------------------------------------|----------------|---------|
|                                                    |                                        | <b>Bacillus phage B13</b>            | UW40188.1      | -       |
| <b>Host DNA at termini</b>                         | Host ends (Mu)                         | <i>Escherichia</i> virus Mu          | AAF01106.1     | [27]    |
|                                                    |                                        | <i>Pseudomonas</i> phage B3          | YP_164067.1    | [28]    |
|                                                    |                                        | <i>Burkholderia</i> virus BcepMu     | YP_024701.1    | [29]    |
|                                                    | Host ends (D3112)                      | <i>Pseudomonas</i> virus MP22        | YP_001469154.1 | [30]    |
|                                                    |                                        | <i>Haemophilus</i> phage SuMu        | YP_007002934.1 | [31]    |
|                                                    |                                        | <i>Pseudomonas</i> virus D3112       | NP_938233.1    | [30]    |
| <b>Circularly permuted direct terminal repeats</b> | Headful (P22)                          | <i>Salmonella</i> virus P22          | YP_063734.1    | [32]    |
|                                                    |                                        | <i>Salmonella</i> phage ST64T        | NP_720326.1    | [33]    |
|                                                    |                                        | <i>Enterobacteria</i> phage LP7      | AAA88220.1     | [34]    |
|                                                    | Headful (Sf6)                          | <i>Shigella</i> phage Sf6            | NP_958178.1    | [35]    |
|                                                    |                                        | <i>Hamiltonella</i> virus APSE1      | NP_050979.1    | [36]    |
|                                                    |                                        | <i>Enterobacteria</i> phage CUS-3    | ABQ88401.1     | [37]    |
|                                                    | Headful (933W)                         | <i>Enterobacteria</i> phage 933W     | NP_049511.1    | [38]    |
|                                                    |                                        | <i>Burkholderia</i> virus Bcep22     | NP_944278.1    | [39]    |
|                                                    | Headful (phiKZ)                        | <i>Pseudomonas</i> phage phiKZ       | NP_803591.1    | [40]    |
|                                                    |                                        | <i>Pseudomonas</i> phage 201phi2-1   | YP_001956731.1 | [41]    |
|                                                    |                                        | <i>Erwinia</i> phage phiEaH2         | YP_007237828.1 | [42]    |
|                                                    | Headful (T4)                           | <i>Enterobacteria</i> phage T4       | NP_049776.1    | [43]    |
|                                                    |                                        | <i>Vibrio</i> phage KVP40            | NP_899601.1    | [43]    |
|                                                    |                                        | <i>Enterobacteria</i> phage RB49     | NP_891724.1    | [44]    |
|                                                    | Headful (phiPLPE)                      | <i>Yersinia</i> phage PY100          | CAJ28416.1     | [45]    |
|                                                    |                                        | <i>Klebsiella</i> phage JD001        | YP_007392855.1 | [46]    |
|                                                    |                                        | <i>Iodobacterteriophage</i> phiPLPE  | YP_002128452.1 | [46]    |
|                                                    | Headful (SPP1)                         | <i>Bacillus</i> phage vB_BcM_Sam46   | QIQ61203.1     | [47]    |
|                                                    |                                        | <i>Bacillus</i> phage SPP1           | NP_690654.1    | [48]    |
|                                                    |                                        | <i>Staphylococcus</i> virus CNPH82   | YP_950600.1    | [49]    |
|                                                    | Headful (B83)                          | <i>Bacillus</i> Phage vB_BtS_B83     | QCQ57785.1     | [50]    |
|                                                    |                                        | <i>Bacillus</i> phage vB_BtS_BMBtp14 | YP_009830709.1 | [50]    |
| <b>Covalent terminal protein (phi29)</b>           | Protein-primed mechanism [Longás,2008] | <i>Bacillus</i> phage phi29          | YP_002004545.1 | [51–53] |
|                                                    |                                        | <i>Bacillus</i> phage Nf             | YP_009910733.1 | [53]    |

Table S4. Phage genomes used for phylogenetic inference.

| №  | Name                                                             | Genome Accession number | Genome length | GC-content, % | SDCs | Number of tRNAs/tmRNAs | BLASTn nucleotide identity to B13, %* | Proteins shared with B13** |       |
|----|------------------------------------------------------------------|-------------------------|---------------|---------------|------|------------------------|---------------------------------------|----------------------------|-------|
|    |                                                                  |                         |               |               |      |                        |                                       | number                     | %     |
| 1  | <i>Bacillus</i> phage B13                                        | OP066531                | 36,864        | 34.8          | 53   | 0/0                    | -                                     | -                          | -     |
| 2  | <i>Bacillus</i> phage BMBtp1                                     | KT852578.1              | 35,838        | 34.9          | 58   | 0/0                    | 27.73                                 | 26                         | 46.85 |
| 3  | Uncultured <i>Caudovirales</i> phage clone 9AX_2, partial genome | MF417893.1              | 43,032        | 34.7          | 61   | 0/0                    | 29.20                                 | 22                         | 38.60 |
| 4  | <i>Bacillus</i> phage phi4J1                                     | NC_029008.1             | 41,486        | 35.9          | 64   | 0/0                    | 31.28                                 | 22                         | 37.60 |
| 5  | <i>Bacillus</i> phage vB_BanS_Athena                             | OK500002.1              | 37,369        | 35.3          | 62   | 0/0                    | 21.54                                 | 16                         | 27.83 |
| 6  | <i>Bacillus</i> phage Waukesha92                                 | NC_025424.1             | 45,648        | 35.5          | 71   | 0/0                    | 12.60                                 | 13                         | 20.97 |
| 7  | <i>Bacillus</i> phage phiS58                                     | KT970646.1              | 46,635        | 35.4          | 70   | 0/0                    | 12.60                                 | 13                         | 21.14 |
| 8  | <i>Bacillus</i> phage vB_BthS-TP21T                              | MK843319.1              | 51,949        | 35.5          | 82   | 0/0                    | 12.60                                 | 13                         | 19.26 |
| 9  | <i>Bacillus</i> phage vB_BtS_BMBtp3                              | NC_028748.2             | 51,366        | 35.4          | 72   | 0/0                    | 9.12                                  | 10                         | 16.00 |
| 10 | <i>Bacillus anthracis</i> phage Cherry                           | DQ222851.1              | 36,615        | 35.3          | 53   | 0/0                    | 8.48                                  | 9                          | 17.00 |
| 11 | <i>Bacillus</i> phage Gamma                                      | NC_007458.1             | 37,253        | 35.2          | 55   | 0/0                    | 8.49                                  | 9                          | 16.70 |
| 12 | <i>Bacillus anthracis</i> phage Gamma isolate d'Herelle          | DQ289556.1              | 37,373        | 35.1          | 56   | 0/0                    | 7.85                                  | 9                          | 16.50 |
| 13 | <i>Bacillus</i> phage AP631                                      | MK085976.1              | 39,549        | 35.0          | 56   | 0/0                    | 7.78                                  | 9                          | 16.50 |
| 14 | <i>Bacillus</i> phage WBeta                                      | NC_007734.1             | 40,867        | 35.3          | 57   | 0/0                    | 7.84                                  | 9                          | 16.36 |

|    |                                      |             |        |      |    |     |       |   |       |
|----|--------------------------------------|-------------|--------|------|----|-----|-------|---|-------|
| 15 | <i>Bacillus</i> phage phi4B1         | NC_028886.1 | 38,663 | 35.9 | 64 | 0/0 | 15.31 | 9 | 15.38 |
| 16 | <i>Bacillus</i> phage Fah            | NC_007814.1 | 37,974 | 34.9 | 54 | 0/0 | 7.79  | 8 | 14.95 |
| 17 | <i>Bacillus</i> phage phIS3501       | NC_019502.1 | 44,401 | 34.9 | 69 | 1/0 | 11.15 | 7 | 11.48 |
| 18 | <i>Bacillus</i> phage phiCM3         | NC_023599.1 | 38,772 | 35.5 | 56 | 0/0 | 9.60  | 6 | 11.01 |
| 19 | <i>Bacillus</i> phage BtCS33         | NC_018085.1 | 41,992 | 35.2 | 59 | 0/0 | 7.57  | 6 | 10.71 |
| 20 | <i>Bacillus</i> phage BceA1          | NC_048628.1 | 42,932 | 35.7 | 63 | 0/0 | 9.10  | 6 | 10.35 |
| 21 | <i>Staphylococcus</i> phage SpaA1    | NC_018277.1 | 42,784 | 35.6 | 65 | 0/0 | 9.10  | 6 | 10.17 |
| 22 | <i>Bacillus</i> phage PfEFR-5        | NC_031055.1 | 43,773 | 35.  | 68 | 0/0 | 7.81  | 6 | 9.92  |
| 23 | <i>Bacillus</i> phage PfEFR-4        | NC_048641.1 | 43,223 | 35.4 | 69 | 0/0 | 7.81  | 6 | 9.84  |
| 24 | <i>Bacillus</i> phage vB_BceS-MY192  | NC_048633.1 | 44,696 | 35.0 | 66 | 0/0 | 7.10  | 5 | 8.40  |
| 25 | <i>Bacillus</i> phage vB_BtS_B83     | NC_048762.1 | 49,952 | 35.8 | 71 | 0/0 | 8.49  | 4 | 6.45  |
| 26 | <i>Bacillus</i> phage vB_BtS_BMBtp14 | NC_048640.1 | 50,740 | 36.8 | 77 | 0/0 | 3.41  | 4 | 6.15  |
| 27 | <i>Bacillus</i> phage TP21-L         | NC_011645.1 | 37,456 | 37.  | 61 | 0/0 | 2.97  | 3 | 5.26  |
| 28 | <i>Bacillus</i> phage vB_BtS_BMBtp2  | NC_019912.1 | 36,932 | 37.8 | 55 | 0/0 | 2.72  | 2 |       |
| 29 | <i>Bacillus</i> phage phBC6A51       | NC_004820.1 | 61,395 | 37.7 | 94 | 0/0 | 5.56  | 0 |       |
| 30 | <i>Bacillus</i> phage vB_BboS-125    | NC_048735.1 | 58,528 | 48.6 | 87 | 0/0 | 0.00  | 0 |       |

\*Determined using BLASTn compared to B13 (multiplying % coverage by % identity); \*\*Determined using GET\_HOMOLOGUES (COGtriangles algorithm, -G -t 0 -C 75).

The additional six phage genomes found by the BLASTn search using the whole B13 genome sequence as the query are light gray.

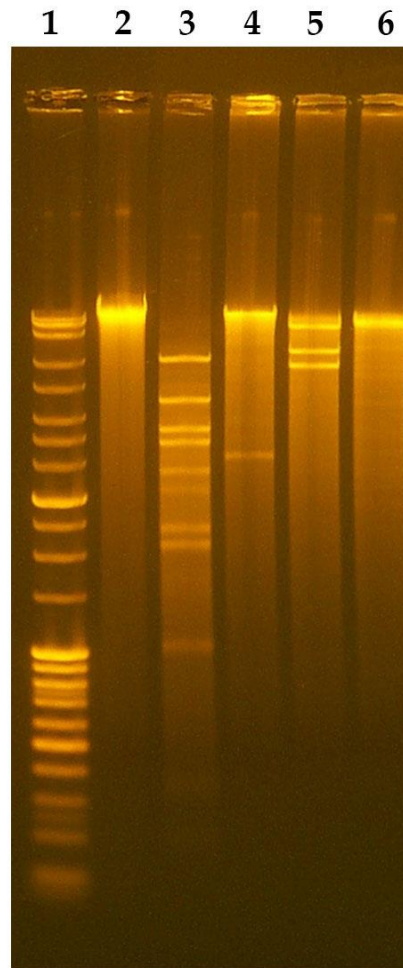

**Figure S1.** Restriction analysis of B13 genomic DNA. This is the original gel image used to generate Figure 6, A in the main text. Kodak EDAS 290 Gel Documentation System ("Kodak") was used to capture the image. 1 – molecular weight markers; 2 – intact phage DNA; 3 – HindIII; 4 – BamHI; 5 – BglII; 6 – PstI.

## References

1. Hong, H.A.; Le, H.D.; Cutting, S.M. The Use of Bacterial Spore Formers as Probiotics. *FEMS Microbiol Rev* 2005, 29.
2. Sorokin, A.; Candelon, B.; Guilloux, K.; Galleron, N.; Wackerow-Kouzova, N.; Ehrlich, S.D.; Bourguet, D.; Sanchis, V. Multiple-Locus Sequence Typing Analysis of *Bacillus Cereus* and *Bacillus Thuringiensis* Reveals Separate Clustering and a Distinct Population Structure of Psychrotrophic Strains. *Appl Environ Microbiol* 2006, 72, doi:10.1128/AEM.72.2.1569-1578.2006.
3. Kazantseva, O.A.; Buzikov, R.M.; Pilipchuk, T.A.; Valentovich, L.N.; Kazantsev, A.N.; Kalamiyets, E.I.; Shadrin, A.M. The Bacteriophage Pf-10—A Component of the Biopesticide “Multiphage” Used to Control Agricultural Crop Diseases Caused by *Pseudomonas Syringae*. *Viruses* 2022, 14, doi:10.3390/v14010042.
4. Casjens, S.R.; Gilcrease, E.B. Determining DNA Packaging Strategy by Analysis of the Termini of the Chromosomes in Tailed-Bacteriophage Virions. *Methods Mol Biol* 2009, 502, doi:10.1007/978-1-60327-565-1\_7.
5. Pajunen, M.I.; Elizondo, M.R.; Skurnik, M.; Kieleczawa, J.; Molineux, I.J. Complete Nucleotide Sequence and Likely Recombinatorial Origin of Bacteriophage T3. *J Mol Biol* 2002, 319, doi:10.1016/S0022-2836(02)00384-4.
6. Pajunen, M.; Kiljunen, S.; Skurnik, M. Bacteriophage ΦYeO3-12, Specific for *Yersinia Enterocolitica* Serotype O:3, Is Related to Coliphages T3 and T7. *J Bacteriol* 2000, 182, doi:10.1128/JB.182.18.5114-5120.2000.
7. Cornelissen, A.; Ceyssens, P.J.; T'Syen, J.; van Praet, H.; Noben, J.P.; Shaburova, O. v.; Krylov, V.N.; Volckaert, G.; Lavigne, R. The T7-Related *Pseudomonas Putida* Phage Φ15 Displays Virion-Associated Biofilm Degradation Properties. *PLoS One* 2011, 6, doi:10.1371/journal.pone.0018597.
8. Li, M.; Chen, X.; Ma, Y.; Li, Z.; Zhao, Q. Complete Genome Sequence of PFP1, a Novel T7-like *Pseudomonas Fluorescens* Bacteriophage. *Arch Virol* 2018, 163, doi:10.1007/s00705-018-3979-3.
9. Wittmann, J.; Turner, D.; Millard, A.D.; Mahadevan, P.; Kropinski, A.M.; Adriaenssens, E.M. From Orphan Phage to a Proposed New Family—the Diversity of N4-like Viruses. *Antibiotics* 2020, 9, doi:10.3390/antibiotics9100663.
10. Ma, Y.; Li, E.; Qi, Z.; Li, H.; Wei, X.; Lin, W.; Zhao, R.; Jiang, A.; Yang, H.; Yin, Z.; et al. Isolation and Molecular Characterisation of *Achromobacter* Phage PhiAxp-3, an N4-like Bacteriophage. *Sci Rep* 2016, 6, doi:10.1038/srep24776.
11. Born, Y.; Fieseler, L.; Marazzi, J.; Lurz, R.; Duffy, B.; Loessner, M.J. Novel Virulent and Broad-Host-Range *Erwinia Amylovora* Bacteriophages Reveal a High Degree of Mosaicism and a Relationship to Enterobacteriaceae Phages. *Appl Environ Microbiol* 2011, 77, doi:10.1128/AEM.03022-10.



12. Sakaguchi, Y.; Hayashi, T.; Kurokawa, K.; Nakayama, K.; Oshima, K.; Fujinaga, Y.; Ohnishi, M.; Ohtsubo, E.; Hattori, M.; Oguma, K. The Genome Sequence of Clostridium Botulinum Type C Neurotoxin-Converting Phage and the Molecular Mechanisms of Unstable Lysogeny. *Proc Natl Acad Sci U S A* **2005**, *102*, doi:10.1073/pnas.0505503102.
13. Skorynina, A. v.; Pilgrimova, E.G.; Kazantseva, O.A.; Kulyabin, V.A.; Baicher, S.D.; Ryabova, N.A.; Shadrin, A.M. Bacillus-Infecting Bacteriophage Izhevsk Harbors Thermostable Endolysin with Broad Range Specificity. *PLoS One* **2020**, *15*, doi:10.1371/journal.pone.0242657.
14. Grose, J.H.; Jensen, J.D.; Merrill, B.D.; Fisher, J.N.B.; Burnett, S.H.; Breakwell, D.P. Genome Sequences of Three Novel Bacillus Cereus Bacteriophages. *Genome Announc* **2014**, *2*, doi:10.1128/genomea.01118-13.
15. Stewart, C.R.; Casjens, S.R.; Cresawn, S.G.; Houtz, J.M.; Smith, A.L.; Ford, M.E.; Peebles, C.L.; Hatfull, G.F.; Hendrix, R.W.; Huang, W.M.; et al. The Genome of Bacillus Subtilis Bacteriophage SPO1. *J Mol Biol* **2009**, *388*, doi:10.1016/j.jmb.2009.03.009.
16. Klumpp, J.; Dorscht, J.; Lurz, R.; Biemann, R.; Wieland, M.; Zimmer, M.; Calendar, R.; Loessner, M.J. The Terminally Redundant, Nonpermuted Genome of Listeria Bacteriophage A511: A Model for the SPO1-like Myoviruses of Gram-Positive Bacteria. *J Bacteriol* **2008**, *190*, doi:10.1128/JB.00461-08.
17. Kilcher, S.; Loessner, M.J.; Klumpp, J. Brochothrix Thermosphacta Bacteriophages Feature Heterogeneous and Highly Mosaic Genomes and Utilize Unique Prophage Insertion Sites. *J Bacteriol* **2010**, *192*, doi:10.1128/JB.00709-10.
18. Kim, M.; Ryu, S. Characterization of a T5-like Coliphage, SPC35, and Differential Development of Resistance to SPC35 in Salmonella Enterica Serovar Typhimurium and Escherichia Coli. *Appl Environ Microbiol* **2011**, *77*, doi:10.1128/AEM.02504-10.
19. Oliveira, H.; Pinto, G.; Hendrix, H.; Noben, J.-P.; Gawor, J.; Kropinski, A.M.; Łobocka, M.; Lavigne, R.; Azeredo, J. A Lytic Providencia Rettgeri Virus of Potential Therapeutic Value Is a Deep-Branching Member of the T5virus Genus. *Appl Environ Microbiol* **2017**, *83*, doi:10.1128/AEM.01567-17.
20. Ravin, N. v. N15: The Linear Phage-Plasmid. *Plasmid* **2011**, *65*.
21. Christie, G.E.; Calendar, R. P2 Bacteriophage. *Bacteriophage* **2016**, *6*, doi:10.1080/21597081.2016.1145782.
22. Bullas, L.R.; Mostaghimi, A.R.; Arensdorf, J.J.; Rajadas, P.T.; Zuccarelli, A.J. Salmonella Phage PSP3, Another Member of the P2-like Phage Group. *Virology* **1991**, *185*, doi:10.1016/0042-6822(91)90573-T.

23. Nakayama, K.; Kanaya, S.; Ohnishi, M.; Terawaki, Y.; Hayashi, T. The Complete Nucleotide Sequence of PhiCTX, a Cytotoxin-Converting Phage of *Pseudomonas Aeruginosa*: Implications for Phage Evolution and Horizontal Gene Transfer via Bacteriophages. *Mol Microbiol* **1999**, *31*, 399–419, doi:10.1046/j.1365-2958.1999.01158.x.
24. Juhala, R.J.; Ford, M.E.; Duda, R.L.; Youlton, A.; Hatfull, G.F.; Hendrix, R.W. Genomic Sequences of Bacteriophages HK97 and HK022: Pervasive Genetic Mosaicism in the Lambdoid Bacteriophages. *J Mol Biol* **2000**, *299*, doi:10.1006/jmbi.2000.3729.
25. Ganyu, A.; Csiszovszki, Z.; Ponyi, T.; Kern, A.; Buzás, Z.; Orosz, L.; Papp, P.P. Identification of Cohesive Ends and Genes Encoding the Terminase of Phage 16-3. *J Bacteriol* **2005**, *187*, doi:10.1128/JB.187.7.2526-2531.2005.
26. Morgan, G.J.; Hatfull, G.F.; Casjens, S.; Hendrix, R.W. Bacteriophage Mu Genome Sequence: Analysis and Comparison with Mu-like Prophages in *Haemophilus*, *Neisseria* and *Deinococcus*. *J Mol Biol* **2002**, *317*, doi:10.1006/jmbi.2002.5437.
27. Braid, M.D.; Silhavy, J.L.; Kitts, C.L.; Cano, R.J.; Howe, M.M. Complete Genomic Sequence of Bacteriophage B3, a Mu-like Phage of *Pseudomonas Aeruginosa*. *J Bacteriol* **2004**, *186*, doi:10.1128/JB.186.19.6560-6574.2004.
28. Summer, E.J.; Gonzalez, C.F.; Carlisle, T.; Mebane, L.M.; Cass, A.M.; Savva, C.G.; LiPuma, J.J.; Young, R. Burkholderia Cenocepacia Phage BcepMu and a Family of Mu-like Phages Encoding Potential Pathogenesis Factors. *J Mol Biol* **2004**, *340*, doi:10.1016/j.jmb.2004.04.053.
29. Heo, Y.J.; Chung, I.Y.; Choi, K.B.; Lau, G.W.; Cho, Y.H. Genome Sequence Comparison and Superinfection between Two Related *Pseudomonas Aeruginosa* Phages, D3112 and MP22. *Microbiology (N Y)* **2007**, *153*, doi:10.1099/mic.0.2007/007260-0.
30. Zehr, E.S.; Tabatabai, L.B.; Bayles, D.O. Genomic and Proteomic Characterization of SuMu, a Mu-like Bacteriophage Infecting *Haemophilus Parasuis*. *BMC Genomics* **2012**, *13*, doi:10.1186/1471-2164-13-331.
31. Byl, C. v.; Kropinski, A.M. Sequence of the Genome of Salmonella Bacteriophage P22. *J Bacteriol* **2000**, *182*, doi:10.1128/JB.182.22.6472-6481.2000.
32. Mmolawa, P.T.; Schmieger, H.; Tucker, C.P.; Heuzenroeder, M.W. Genomic Structure of the Salmonella Enterica Serovar Typhimurium DT 64 Bacteriophage ST64T: Evidence for Modular Genetic Architecture. *J Bacteriol* **2003**, *185*, doi:10.1128/JB.185.11.3473-3475.2003.
33. Bernhard Petri, J.; Schmieger, H. Isolation of Fragments with Pac Function for Phage P22 from Phage LP7 DNA and Comparison of Packaging Gene 3 Sequences. *Gene* **1990**, *88*, doi:10.1016/0378-1119(90)90058-Y.

34. Zhao, H.; Christensen, T.E.; Kamau, Y.N.; Tang, L. Structures of the Phage Sf6 Large Terminase Provide New Insights into DNA Translocation and Cleavage. *Proc Natl Acad Sci U S A* **2013**, *110*, doi:10.1073/pnas.1301133110.
35. van der Wilk, F.; Dullemans, A.M.; Verbeek, M.; van den Heuvel, J.F.J.M. Isolation and Characterization of APSE-1, a Bacteriophage Infecting the Secondary Endosymbiont of *Acyrtosiphon Pisum*. *Virology* **1999**, *262*, doi:10.1006/viro.1999.9902.
36. King, M.R.; Vimr, R.P.; Steenbergen, S.M.; Spanjaard, L.; Plunkett, G.; Blattner, F.R.; Vimr, E.R. Escherichia Coli K1-Specific Bacteriophage CUS-3 Distribution and Function in Phase-Variable Capsular Polysialic Acid O Acetylation. *J Bacteriol* **2007**, *189*, doi:10.1128/JB.00657-07.
37. Plunkett, G.; Rose, D.J.; Durfee, T.J.; Blattner, F.R. Sequence of Shiga Toxin 2 Phage 933W from Escherichia Coli O157:H7: Shiga Toxin as a Phage Late-Gene Product? *J Bacteriol* **1999**, *181*, doi:10.1128/jb.181.6.1767-1778.1999.
38. Gill, J.J.; Summer, E.J.; Russell, W.K.; Cologna, S.M.; Carlile, T.M.; Fuller, A.C.; Kitsopoulos, K.; Mebane, L.M.; Parkinson, B.N.; Sullivan, D.; et al. Genomes and Characterization of Phages Bcep22 and BcepIL02, Founders of a Novel Phage Type in *Burkholderia Cenocepacia*. *J Bacteriol* **2011**, *193*, doi:10.1128/JB.05287-11.
39. Lecoutere, E.; Ceyssens, P.J.; Miroshnikov, K.A.; Mesyanzhinov, V. v.; Krylov, V.N.; Noben, J.P.; Robben, J.; Hertveldt, K.; Volckaert, G.; Lavigne, R. Identification and Comparative Analysis of the Structural Proteomes of  $\Phi$ KZ and EL, Two Giant *Pseudomonas Aeruginosa* Bacteriophages. *Proteomics* **2009**, *9*, doi:10.1002/pmic.200800727.
40. Thomas, J.A.; Rolando, M.R.; Carroll, C.A.; Shen, P.S.; Belnap, D.M.; Weintraub, S.T.; Serwer, P.; Hardies, S.C. Characterization of *Pseudomonas Chlororaphis* Myovirus 201 $\phi$ 2-1 via Genomic Sequencing, Mass Spectrometry, and Electron Microscopy. *Virology* **2008**, *376*, doi:10.1016/j.virol.2008.04.004.
41. Dömötör, D.; Becságh, P.; Rákhely, G.; Schneider, G.; Kovács, T. Complete Genomic Sequence of *Erwinia Amylovora* Phage PhiEaH2. *J Virol* **2012**, *86*, doi:10.1128/jvi.01870-12.
42. Miller, E.S.; Heidelberg, J.F.; Eisen, J.A.; Nelson, W.C.; Durkin, A.S.; Ciecko, A.; Feldblyum, T. v.; White, O.; Paulsen, I.T.; Niernan, W.C.; et al. Complete Genome Sequence of the Broad-Host-Range Vibriophage KVP40: Comparative Genomics of a T4-Related Bacteriophage. *J Bacteriol* **2003**, *185*, doi:10.1128/JB.185.17.5220-5233.2003.
43. Desplats, C.; Dez, C.; Tétart, F.; Eleaume, H.; Krisch, H.M. Snapshot of the Genome of the Pseudo-T-Even Bacteriophage RB49. *J Bacteriol* **2002**, *184*, doi:10.1128/JB.184.10.2789-2804.2002.

44. Schwudke, D.; Ergin, A.; Michael, K.; Volkmar, S.; Appel, B.; Knabner, D.; Konietzny, A.; Strauch, E. Broad-Host-Range Yersinia Phage PY100: Genome Sequence, Proteome Analysis of Virions, and DNA Packaging Strategy. *J Bacteriol* **2008**, *190*, doi:10.1128/JB.01402-07.
45. Cui, Z.; Shen, W.; Wang, Z.; Zhang, H.; Me, R.; Wang, Y.; Zeng, L.; Zhu, Y.; Qin, J.; He, P.; et al. Complete Genome Sequence of Klebsiella Pneumoniae Phage JD001. *J Virol* **2012**, *86*, doi:10.1128/jvi.02435-12.
46. Leblanc, C.; Caumont-Sarcos, A.; Comeau, A.M.; Krisch, H.M. Isolation and Genomic Characterization of the First Phage Infecting Iodobacteria:  $\Phi$ PLPE, a Myovirus Having a Novel Set of Features. *Environ Microbiol Rep* **2009**, *1*, doi:10.1111/j.1758-2229.2009.00055.x.
47. Kazantseva, O.A.; Pilgrimova, E.G.; Shadrin, A.M. VB\_BcM\_Sam46 and VB\_BcM\_Sam112, Members of a New Bacteriophage Genus with Unusual Small Terminase Structure. *Sci Rep* **2021**, *11*, doi:10.1038/s41598-021-91289-x.
48. Alonso, J.C.; Lüder, G.; Stiege, A.C.; Chai, S.; Weise, F.; Trautner, T.A. The Complete Nucleotide Sequence and Functional Organization of Bacillus Subtilis Bacteriophage SPP1. *Gene* **1997**, *204*, doi:10.1016/S0378-1119(97)00547-7.
49. Daniel, A.; Bonnen, P.E.; Fischetti, V.A. First Complete Genome Sequence of Two Staphylococcus Epidermidis Bacteriophages. *J Bacteriol* **2007**, *189*, doi:10.1128/JB.01637-06.
50. Pilgrimova, E.G.; Kazantseva, O.A.; Nikulin, N.A.; Shadrin, A.M. Bacillus Phage VB\_BtS\_b83 Previously Designated as a Plasmid May Represent a New Siphoviridae Genus. *Viruses* **2019**, *11*, doi:10.3390/v11070624.
51. Simpson, A.A.; Tao, Y.; Leiman, P.G.; Badasso, M.O.; He, Y.; Jardine, P.J.; Olson, N.H.; Morais, M.C.; Grimes, S.; Anderson, D.L.; et al. Structure of the Bacteriophage  $\Phi$ 29 DNA Packaging Motor. *Nature* **2000**, *408*, doi:10.1038/35047129.
52. Morais, M.C.; Koti, J.S.; Bowman, V.D.; Reyes-Aldrete, E.; Anderson, D.L.; Rossmann, M.G. Defining Molecular and Domain Boundaries in the Bacteriophage  $\Phi$ 29 DNA Packaging Motor. *Structure* **2008**, *16*, doi:10.1016/j.str.2008.05.010.
53. Longás, E.; Villar, L.; Lázaro, J.M.; de Vega, M.; Salas, M. Phage  $\Phi$ 29 and Nf Terminal Protein-Priming Domain Specifies the Internal Template Nucleotide to Initiate DNA Replication. *Proc Natl Acad Sci U S A* **2008**, *105*, doi:10.1073/pnas.0809882105.
